# Supplementary material for: A minimally destructive protocol for DNA extraction from ancient teeth
Source: HighWire-hosted journal article supplement (doi:10.1101/gr.267534.120), 2021-02-12
Supplement: Supplemental_Table_S2.xlsx [file Supplemental_Table_S2.xlsx]

## Sheet: Supplemental Table S2
Supplemental Table S2 - Results of Wilcoxon signed-rank tests, comparing the performance of data produced via Method MDE and either Method WTR or P. A threshold of p=0.05 is used to denote significance (cells are highlighted in green when p<=0.05) and can only be achieved if there are a minimum of 6 comparisons per test (cells are highlighted in orange in cases where this requirement is violated)…
Filtering	Comparisions	Percent Endogenous (pre-capture libraries)	Complexity (Percentage of unique reads out of 1,000,000 sequenced reads) (captured libaries)	Complexity (Informative Sequence Content) (captured libaries)	mtDNA match to consensus rate (captured libraries)****	Autosomal Contamination Rate (contamLD) (captured libaries)****	Contamination Rate (Assessed in Genetic Males via ANGSD) (captured libaries)****	Median length of sequences aligning to the human genome (pre-capture libraries)	C-to-T damage rate at 5' end of molecules aligning to the human genome (pre-capture libraries)	mtDNA match to consensus rate (captured libraries)(restricting to cases where both samples have > 10% endogenous in pre-capture libraries)	mtDNA match to consensus rate (captured libraries)(restricting to cases where both samples have > 20% endogenous in pre-capture libraries)	mtDNA match to consensus rate (captured libraries)(restricting to cases where both samples have <30% endogenous in pre-capture libraries)
Data filtered (Individuals 5, 6, & 22 excluded)	MDE vs WTR	0.004	0.792	0.107	0.004	0.49	0.293	0.375	0.249	0.093	0.866	0.028
	(# inds included in calc)	27	27	27	27	20	6	27	27	13	7	9
	MDE vs P	1	0.091	0.043	0.31	0.893	0.655	0.034	0.028
	(# inds included in calc)	7	7	7	7	5	3	7	7
No filtering	MDE vs WTR	0.002	0.797	0.086	0.004	0.49	0.293	0.468	0.239
	(# inds included in calc)	30	30	29	27	20	6	30	30
	MDE vs P	0.953	0.123	0.028	0.31	0.893	0.655	0.049	0.036
	(# inds included in calc)	9	8	9	7	5	3	9	9
Double Stranded Libraries Only - Data filtered (Individuals 5 & 6 excluded)	MDE vs WTR	0.123	0.4	0.779	0.092	0.6	0.285	0.344	1
	(# inds included in calc)	8	8	8	8	6	3	8	8
Single Stranded Libraries Only - Data filtered (Individual 22 excluded)	MDE vs WTR	0.012	0.748	0.049	0.019	0.925	1	0.183	0.243
	(# inds included in calc)	19	19	19	19	14	3	19	19
